# Supplementary material for: Integrative transcriptome analysis of malignant pleural mesothelioma reveals a clinically relevant immune-based classification
Source: PubMed Central journal article supplement — J Immunother Cancer. 2021 Feb 25;9(2):e001601. doi: 10.1136/jitc-2020-001601 (PMC7908918; doi:10.1136/jitc-2020-001601), 2021-02-25
Supplement: jitc-2020-001601supp003.pdf [file jitc-2020-001601supp003.pdf]

## SUPPLEMENTARY TABLES

Supplementary Table 1. Summary of clinicopathological variables in each dataset.

| Dataset                     | <a href="#">Bueno et al.<br/>EGAD00001001915</a> | <a href="#">Hmeljak et al.<br/>TCGA2BED</a> | <a href="#">Suraokar et al.<br/>GSE51024</a> | <a href="#">DeReyniès et al.<br/>E-MTAB-1719</a> | <a href="#">Bott et al.<br/>GSE29354</a> | <a href="#">Lopez-Rios et al.<br/>PMID 16540645</a> | <a href="#">Gordon et al.<br/>GSE2549</a> | Total            | P-value |
|-----------------------------|--------------------------------------------------|---------------------------------------------|----------------------------------------------|--------------------------------------------------|------------------------------------------|-----------------------------------------------------|-------------------------------------------|------------------|---------|
| Platform                    | Illumina HiSeq 2500 RNA Sequencing               | Illumina HiSeq 2000 RNA Sequencing          | Affymetrix Human Genome U133 Plus 2.0 Array  | Affymetrix Human Genome U133 Plus 2.0 Array      | Affymetrix Human Genome U133A Array      | Affymetrix Human Genome U133A Array                 | Affymetrix Human Genome U133A Array       |                  |         |
| Total samples               | 211                                              | 87                                          | 96                                           | 38                                               | 53                                       | 99                                                  | 54                                        | 638              |         |
| Included samples            | 211                                              | 74                                          | 53                                           | 38                                               | 53                                       | 47                                                  | 40                                        | 516              |         |
| Age, Median (Range)         | 65.40 (18.8 - 86)                                | 64 (28 - 81)                                | -                                            | -                                                | 63 (33 - 78)                             | 62 (33 - 78)                                        | -                                         | 64.5 (18.8 - 86) | 0.041   |
| Sex, N (%):                 |                                                  |                                             |                                              |                                                  |                                          |                                                     |                                           |                  | 0.005   |
| Male                        | 176 (83.41%)                                     | 61 (82.43%)                                 | -                                            | -                                                | 34 (64.15%)                              | 42 (89.36%)                                         | -                                         | 313 (81.30%)     |         |
| Female                      | 35 (16.59%)                                      | 13 (17.57%)                                 | -                                            | -                                                | 19 (35.85%)                              | 5 (10.64%)                                          | -                                         | 72 (18.70%)      |         |
| Stage, N (%):               |                                                  |                                             |                                              |                                                  |                                          |                                                     |                                           |                  | 0.002   |
| Stage I                     | 6 (3.26%)                                        | 8 (10.81%)                                  | -                                            | -                                                | 7 (13.73%)                               | -                                                   | 1 (2.56%)                                 | 22 (6.32%)       |         |
| Stage II                    | 25 (13.59%)                                      | 14 (18.92%)                                 | -                                            | -                                                | 11 (21.57%)                              | -                                                   | 11 (28.21%)                               | 61 (17.53%)      |         |
| Stage III                   | 114 (61.96%)                                     | 36 (48.65%)                                 | -                                            | -                                                | 21 (41.18%)                              | -                                                   | 27 (69.23%)                               | 198 (56.90%)     |         |
| Stage IV                    | 39 (21.20%)                                      | 16 (21.62%)                                 | -                                            | -                                                | 12 (23.53%)                              | -                                                   | 0 (0.00%)                                 | 67 (19.25%)      |         |
| Histology, N (%):           |                                                  |                                             |                                              |                                                  |                                          |                                                     |                                           |                  | 0.03    |
| Epithelioid                 | 141 (66.82%)                                     | 52 (76.47%)                                 | 35 (66.04%)                                  | 28 (77.78%)                                      | 38 (71.70%)                              | 32 (68.09%)                                         | 23 (58.97%)                               | 349 (68.84%)     |         |
| Biphasic                    | 62 (29.38%)                                      | 13 (19.12%)                                 | 12 (22.64%)                                  | 4 (11.11%)                                       | 10 (18.87%)                              | 10 (21.28%)                                         | 16 (41.03%)                               | 127 (25.05%)     |         |
| Sarcomatoid                 | 8 (3.79%)                                        | 3 (4.41%)                                   | 6 (11.32%)                                   | 4 (11.11%)                                       | 5 (9.43%)                                | 5 (10.64%)                                          | 0 (0.00%)                                 | 31 (6.11%)       |         |
| Asbestos, N (%):            |                                                  |                                             |                                              |                                                  |                                          |                                                     |                                           |                  | 0.051   |
| No                          | 56 (27.32%)                                      | 13 (22.03%)                                 | -                                            | 0 (%)                                            | 22 (44.90%)                              | 7 (18.42%)                                          | -                                         | 98 (27.92%)      |         |
| Possible                    | 4 (1.95%)                                        | 0 (0.00%)                                   | -                                            | 0 (%)                                            | 0 (0.00%)                                | 0 (0.00%)                                           | -                                         | 4 (1.14%)        |         |
| Yes                         | 145 (70.73%)                                     | 46 (77.97%)                                 | -                                            | 0 (%)                                            | 27 (55.10%)                              | 31 (81.58%)                                         | -                                         | 249 (70.94%)     |         |
| Neoadjuvant therapy, N (%): |                                                  |                                             |                                              |                                                  |                                          |                                                     |                                           |                  | <0.001  |
| No                          | 180 (85.31%)                                     | 74 (100.00%)                                | -                                            | -                                                | -                                        | -                                                   | 40 (100.00%)                              | 249 (90.46%)     |         |
| Yes                         | 31 (14.69%)                                      | 0 (0.00%)                                   | -                                            | -                                                | -                                        | -                                                   | 0 (0.00%)                                 | 31 (9.54%)       |         |
| Survival data available:    | Yes                                              | Yes                                         | No                                           | Missing covariates                               | Yes                                      | No                                                  | Missing covariates                        |                  |         |

**Supplementary Table 2.** Immune fractions gene expression signatures

| <b>Immune fraction</b> | <b>Source</b>      | <b>Gene</b>  |
|------------------------|--------------------|--------------|
| B-cells                | Bindea et al. [16] | MS4A1        |
| B-cells                | Bindea et al. [16] | TCL1A        |
| B-cells                | Bindea et al. [16] | HLA-DOB      |
| B-cells                | Bindea et al. [16] | PNOC         |
| B-cells                | Bindea et al. [16] | FAM30A       |
| B-cells                | Bindea et al. [16] | CD19         |
| B-cells                | Bindea et al. [16] | CR2          |
| B-cells                | Bindea et al. [16] | IGHG1        |
| B-cells                | Bindea et al. [16] | FCRL2        |
| B-cells                | Bindea et al. [16] | BLK          |
| B-cells                | Bindea et al. [16] | COCH         |
| B-cells                | Bindea et al. [16] | OSBPL10      |
| B-cells                | Bindea et al. [16] | IGHA1        |
| B-cells                | Bindea et al. [16] | TNFRSF17     |
| B-cells                | Bindea et al. [16] | ABCB4        |
| B-cells                | Bindea et al. [16] | BLNK         |
| B-cells                | Bindea et al. [16] | GLDC         |
| B-cells                | Bindea et al. [16] | MEF2C        |
| B-cells                | Bindea et al. [16] | IGHM         |
| B-cells                | Bindea et al. [16] | SPIB         |
| B-cells                | Bindea et al. [16] | BCL11A       |
| B-cells                | Bindea et al. [16] | GNG7         |
| B-cells                | Bindea et al. [16] | IGKC         |
| B-cells                | Bindea et al. [16] | CD72         |
| B-cells                | Bindea et al. [16] | MICAL3       |
| B-cells                | Bindea et al. [16] | BACH2        |
| B-cells                | Bindea et al. [16] | IGL          |
| B-cells                | Bindea et al. [16] | CCR9         |
| B-cells                | Bindea et al. [16] | QRSL1        |
| B-cells                | Bindea et al. [16] | DTNB         |
| B-cells                | Bindea et al. [16] | HLA-DQA1     |
| B-cells                | Bindea et al. [16] | SCN3A        |
| B-cells                | Bindea et al. [16] | SLC15A2      |
| CD8_T-cells            | Bindea et al. [16] | CD8B         |
| CD8_T-cells            | Bindea et al. [16] | CD8A         |
| CD8_T-cells            | Bindea et al. [16] | PF4          |
| CD8_T-cells            | Bindea et al. [16] | PRR5         |
| CD8_T-cells            | Bindea et al. [16] | SF1          |
| CD8_T-cells            | Bindea et al. [16] | LIME1        |
| CD8_T-cells            | Bindea et al. [16] | DNAJB1       |
| CD8_T-cells            | Bindea et al. [16] | ARHGAP8      |
| CD8_T-cells            | Bindea et al. [16] | GZMM         |
| CD8_T-cells            | Bindea et al. [16] | SLC16A7      |
| CD8_T-cells            | Bindea et al. [16] | SRSF7        |
| CD8_T-cells            | Bindea et al. [16] | APBA2        |
| CD8_T-cells            | Bindea et al. [16] | HAUS3        |
| CD8_T-cells            | Bindea et al. [16] | LEPROTL1     |
| CD8_T-cells            | Bindea et al. [16] | ZFP36L2      |
| CD8_T-cells            | Bindea et al. [16] | GADD45A      |
| CD8_T-cells            | Bindea et al. [16] | KAT6A        |
| CD8_T-cells            | Bindea et al. [16] | ZEB1         |
| CD8_T-cells            | Bindea et al. [16] | ZNF609       |
| CD8_T-cells            | Bindea et al. [16] | MAPKAPK5-AS1 |
| CD8_T-cells            | Bindea et al. [16] | THUMPDI      |
| CD8_T-cells            | Bindea et al. [16] | VAMP2        |
| CD8_T-cells            | Bindea et al. [16] | ZNF91        |
| CD8_T-cells            | Bindea et al. [16] | ZNF22        |
| CD8_T-cells            | Bindea et al. [16] | TMC6         |

|                 |                    |          |
|-----------------|--------------------|----------|
| CD8_T-cells     | Bindea et al. [16] | FLT3LG   |
| CD8_T-cells     | Bindea et al. [16] | CDKN2AIP |
| CD8_T-cells     | Bindea et al. [16] | TSC22D3  |
| CD8_T-cells     | Bindea et al. [16] | TBCC     |
| CD8_T-cells     | Bindea et al. [16] | RBM3     |
| CD8_T-cells     | Bindea et al. [16] | ABT1     |
| CD8_T-cells     | Bindea et al. [16] | TMEM259  |
| CD8_T-cells     | Bindea et al. [16] | CAMLG    |
| CD8_T-cells     | Bindea et al. [16] | PPP1R2   |
| CD8_T-cells     | Bindea et al. [16] | AES      |
| CD8_T-cells     | Bindea et al. [16] | KLF9     |
| CD8_T-cells     | Bindea et al. [16] | PRF1     |
| Cytotoxic_cells | Bindea et al. [16] | KLRD1    |
| Cytotoxic_cells | Bindea et al. [16] | KLRF1    |
| Cytotoxic_cells | Bindea et al. [16] | GNLY     |
| Cytotoxic_cells | Bindea et al. [16] | CTSW     |
| Cytotoxic_cells | Bindea et al. [16] | KLRB1    |
| Cytotoxic_cells | Bindea et al. [16] | KLRK1    |
| Cytotoxic_cells | Bindea et al. [16] | NGK7     |
| Cytotoxic_cells | Bindea et al. [16] | GZMH     |
| Cytotoxic_cells | Bindea et al. [16] | SIGIRR   |
| Cytotoxic_cells | Bindea et al. [16] | ZBTB16   |
| Cytotoxic_cells | Bindea et al. [16] | RUNX3    |
| Cytotoxic_cells | Bindea et al. [16] | APOL3    |
| Cytotoxic_cells | Bindea et al. [16] | RORA     |
| Cytotoxic_cells | Bindea et al. [16] | APBA2    |
| Cytotoxic_cells | Bindea et al. [16] | WHAMMP3  |
| Cytotoxic_cells | Bindea et al. [16] | DUSP2    |
| Cytotoxic_cells | Bindea et al. [16] | GZMA     |
| TFH             | Bindea et al. [16] | CHI3L2   |
| TFH             | Bindea et al. [16] | CXCL13   |
| TFH             | Bindea et al. [16] | MYO7A    |
| TFH             | Bindea et al. [16] | CHGB     |
| TFH             | Bindea et al. [16] | ICA1     |
| TFH             | Bindea et al. [16] | HEY1     |
| TFH             | Bindea et al. [16] | CDK5R1   |
| TFH             | Bindea et al. [16] | ST8SIA1  |
| TFH             | Bindea et al. [16] | PDCD1    |
| TFH             | Bindea et al. [16] | CXCR5    |
| TFH             | Bindea et al. [16] | KIAA1324 |
| TFH             | Bindea et al. [16] | PVALB    |
| TFH             | Bindea et al. [16] | TSHR     |
| TFH             | Bindea et al. [16] | LDLRAD4  |
| TFH             | Bindea et al. [16] | TOX      |
| TFH             | Bindea et al. [16] | SLC7A10  |
| TFH             | Bindea et al. [16] | SMAD1    |
| TFH             | Bindea et al. [16] | POMT1    |
| TFH             | Bindea et al. [16] | PASK     |
| TFH             | Bindea et al. [16] | MKL2     |
| TFH             | Bindea et al. [16] | PTPN13   |
| TFH             | Bindea et al. [16] | KCNK5    |
| TFH             | Bindea et al. [16] | ZNF764   |
| TFH             | Bindea et al. [16] | MAF      |
| TFH             | Bindea et al. [16] | MYO6     |
| TFH             | Bindea et al. [16] | SIRPG    |
| TFH             | Bindea et al. [16] | THADA    |
| TFH             | Bindea et al. [16] | MAGEH1   |
| TFH             | Bindea et al. [16] | B3GAT1   |
| TFH             | Bindea et al. [16] | SH3TC1   |
| TFH             | Bindea et al. [16] | HIST1H4K |

|            |                         |          |
|------------|-------------------------|----------|
| TFH        | Bindea et al. [16]      | STK39    |
| Th1_cells  | Bindea et al. [16]      | IFNG     |
| Th1_cells  | Bindea et al. [16]      | LTA      |
| Th1_cells  | Bindea et al. [16]      | APBB2    |
| Th1_cells  | Bindea et al. [16]      | DOK5     |
| Th1_cells  | Bindea et al. [16]      | IL12RB2  |
| Th1_cells  | Bindea et al. [16]      | APOD     |
| Th1_cells  | Bindea et al. [16]      | ZBTB32   |
| Th1_cells  | Bindea et al. [16]      | CD38     |
| Th1_cells  | Bindea et al. [16]      | CSF2     |
| Th1_cells  | Bindea et al. [16]      | CTLA4    |
| Th1_cells  | Bindea et al. [16]      | CD70     |
| Th1_cells  | Bindea et al. [16]      | DPP4     |
| Th1_cells  | Bindea et al. [16]      | EGFL6    |
| Th1_cells  | Bindea et al. [16]      | BST2     |
| Th1_cells  | Bindea et al. [16]      | DUSP5    |
| Th1_cells  | Bindea et al. [16]      | LRP8     |
| Th1_cells  | Bindea et al. [16]      | IL22     |
| Th1_cells  | Bindea et al. [16]      | DGKI     |
| Th1_cells  | Bindea et al. [16]      | CCL4     |
| Th1_cells  | Bindea et al. [16]      | GGT1     |
| Th1_cells  | Bindea et al. [16]      | LRRN3    |
| Th1_cells  | Bindea et al. [16]      | SYNGR3   |
| Th1_cells  | Bindea et al. [16]      | ATP9A    |
| Th1_cells  | Bindea et al. [16]      | BTG3     |
| Th1_cells  | Bindea et al. [16]      | CMAHP    |
| Th1_cells  | Bindea et al. [16]      | HBEGF    |
| Th1_cells  | Bindea et al. [16]      | SGCB     |
| TH17_cells | Bindea et al. [16]      | IL17A    |
| TH17_cells | Bindea et al. [16]      | IL17RA   |
| TH17_cells | Bindea et al. [16]      | RORC     |
| Th2_cells  | Bindea et al. [16]      | PMCH     |
| Th2_cells  | Bindea et al. [16]      | AHI1     |
| Th2_cells  | Bindea et al. [16]      | PTGIS    |
| Th2_cells  | Bindea et al. [16]      | CXCR6    |
| Th2_cells  | Bindea et al. [16]      | EVI5     |
| Th2_cells  | Bindea et al. [16]      | IL26     |
| Th2_cells  | Bindea et al. [16]      | MB       |
| Th2_cells  | Bindea et al. [16]      | NEIL3    |
| Th2_cells  | Bindea et al. [16]      | GSTA4    |
| Th2_cells  | Bindea et al. [16]      | PHEX     |
| Th2_cells  | Bindea et al. [16]      | SMAD2    |
| Th2_cells  | Bindea et al. [16]      | CENPF    |
| Th2_cells  | Bindea et al. [16]      | ANK1     |
| Th2_cells  | Bindea et al. [16]      | ADCY1    |
| Th2_cells  | Bindea et al. [16]      | AI582773 |
| Th2_cells  | Bindea et al. [16]      | LAIR2    |
| Th2_cells  | Bindea et al. [16]      | SNRPD2   |
| Th2_cells  | Bindea et al. [16]      | MICAL2   |
| Th2_cells  | Bindea et al. [16]      | DHFR     |
| Th2_cells  | Bindea et al. [16]      | WDHD1    |
| Th2_cells  | Bindea et al. [16]      | BIRC5    |
| Th2_cells  | Bindea et al. [16]      | SLC39A14 |
| Th2_cells  | Bindea et al. [16]      | HELLS    |
| Th2_cells  | Bindea et al. [16]      | LIMA1    |
| Th2_cells  | Bindea et al. [16]      | CDC25C   |
| Th2_cells  | Bindea et al. [16]      | CDC7     |
| Th2_cells  | Bindea et al. [16]      | GATA3    |
| Treg_cells | Charoentong et al. [17] | CCL3L1   |
| Treg_cells | Charoentong et al. [17] | CD72     |

|            |                         |              |
|------------|-------------------------|--------------|
| Treg_cells | Charoentong et al. [17] | CLEC5A       |
| Treg_cells | Charoentong et al. [17] | FOXP3        |
| Treg_cells | Charoentong et al. [17] | ITGA4        |
| Treg_cells | Charoentong et al. [17] | L1CAM        |
| Treg_cells | Charoentong et al. [17] | LIPA         |
| Treg_cells | Charoentong et al. [17] | LRP1         |
| Treg_cells | Charoentong et al. [17] | LRRC42       |
| Treg_cells | Charoentong et al. [17] | MARCO        |
| Treg_cells | Charoentong et al. [17] | MMP12        |
| Treg_cells | Charoentong et al. [17] | MNDA         |
| Treg_cells | Charoentong et al. [17] | MRC1         |
| Treg_cells | Charoentong et al. [17] | MS4A6A       |
| Treg_cells | Charoentong et al. [17] | PELO         |
| Treg_cells | Charoentong et al. [17] | PLEK         |
| Treg_cells | Charoentong et al. [17] | PRSS23       |
| Treg_cells | Charoentong et al. [17] | PTGIR        |
| Treg_cells | Charoentong et al. [17] | ST8SIA4      |
| Treg_cells | Charoentong et al. [17] | STAB1        |
| Tcm        | Bindea et al. [16]      | CDC14A       |
| Tcm        | Bindea et al. [16]      | ATM          |
| Tcm        | Bindea et al. [16]      | USP9Y        |
| Tcm        | Bindea et al. [16]      | PCNX1        |
| Tcm        | Bindea et al. [16]      | FOXP1        |
| Tcm        | Bindea et al. [16]      | KLF12        |
| Tcm        | Bindea et al. [16]      | ST3GAL1      |
| Tcm        | Bindea et al. [16]      | INPP4B       |
| Tcm        | Bindea et al. [16]      | CASP8        |
| Tcm        | Bindea et al. [16]      | KMT2A        |
| Tcm        | Bindea et al. [16]      | PCM1         |
| Tcm        | Bindea et al. [16]      | RP11-74E24.2 |
| Tcm        | Bindea et al. [16]      | PHC3         |
| Tcm        | Bindea et al. [16]      | NFATC3       |
| Tcm        | Bindea et al. [16]      | LOC202134    |
| Tcm        | Bindea et al. [16]      | TIMM8A       |
| Tcm        | Bindea et al. [16]      | ATF7IP       |
| Tcm        | Bindea et al. [16]      | REPS1        |
| Tcm        | Bindea et al. [16]      | PSPC1        |
| Tcm        | Bindea et al. [16]      | RPP38        |
| Tcm        | Bindea et al. [16]      | HNRNPH1      |
| Tcm        | Bindea et al. [16]      | STX16        |
| Tcm        | Bindea et al. [16]      | CYLD         |
| Tcm        | Bindea et al. [16]      | SNRPN        |
| Tcm        | Bindea et al. [16]      | TRAF3IP3     |
| Tcm        | Bindea et al. [16]      | NEFL         |
| Tcm        | Bindea et al. [16]      | POLR2J2      |
| Tcm        | Bindea et al. [16]      | AQP3         |
| Tcm        | Bindea et al. [16]      | CG030        |
| Tcm        | Bindea et al. [16]      | PDXDC2P      |
| Tcm        | Bindea et al. [16]      | CLUAP1       |
| Tcm        | Bindea et al. [16]      | DOCK9        |
| Tcm        | Bindea et al. [16]      | TXLNGY       |
| Tcm        | Bindea et al. [16]      | CREBZF       |
| Tcm        | Bindea et al. [16]      | CEP68        |
| Tcm        | Bindea et al. [16]      | TXK          |
| Tcm        | Bindea et al. [16]      | SLC7A6       |
| Tcm        | Bindea et al. [16]      | FYB1         |
| Tcm        | Bindea et al. [16]      | MAP3K1       |
| Tgd        | Bindea et al. [16]      | TRD          |
| Tgd        | Bindea et al. [16]      | TARP         |
| Tgd        | Bindea et al. [16]      | C1orf61      |

|                     |                    |          |
|---------------------|--------------------|----------|
| Tgd                 | Bindea et al. [16] | CD160    |
| Tgd                 | Bindea et al. [16] | FEZ1     |
| Tem                 | Bindea et al. [16] | TRA      |
| Tem                 | Bindea et al. [16] | PRKY     |
| Tem                 | Bindea et al. [16] | EZR      |
| Tem                 | Bindea et al. [16] | GDPD5    |
| Tem                 | Bindea et al. [16] | CCR2     |
| Tem                 | Bindea et al. [16] | MEFV     |
| Tem                 | Bindea et al. [16] | SND1-IT1 |
| Tem                 | Bindea et al. [16] | FLI1     |
| Tem                 | Bindea et al. [16] | TBC1D5   |
| Tem                 | Bindea et al. [16] | DDX17    |
| Tem                 | Bindea et al. [16] | AKT3     |
| Tem                 | Bindea et al. [16] | EWSR1    |
| Tem                 | Bindea et al. [16] | TBCD     |
| Tem                 | Bindea et al. [16] | NFATC4   |
| Tem                 | Bindea et al. [16] | LTK      |
| NK_CD56bright_cells | Bindea et al. [16] | DUSP4    |
| NK_CD56bright_cells | Bindea et al. [16] | RRAD     |
| NK_CD56bright_cells | Bindea et al. [16] | XCL1     |
| NK_CD56bright_cells | Bindea et al. [16] | PLA2G6   |
| NK_CD56bright_cells | Bindea et al. [16] | NIBP     |
| NK_CD56bright_cells | Bindea et al. [16] | FOXJ1    |
| NK_CD56bright_cells | Bindea et al. [16] | MARCH6   |
| NK_CD56bright_cells | Bindea et al. [16] | MADD     |
| NK_CD56bright_cells | Bindea et al. [16] | BG255923 |
| NK_CD56bright_cells | Bindea et al. [16] | MPPED1   |
| NK_CD56bright_cells | Bindea et al. [16] | MUC3B    |
| NK_CD56dim_cells    | Bindea et al. [16] | KIR3DL2  |
| NK_CD56dim_cells    | Bindea et al. [16] | SPON2    |
| NK_CD56dim_cells    | Bindea et al. [16] | KIR2DL3  |
| NK_CD56dim_cells    | Bindea et al. [16] | GZMB     |
| NK_CD56dim_cells    | Bindea et al. [16] | KIR3DS1  |
| NK_CD56dim_cells    | Bindea et al. [16] | KIR3DL1  |
| NK_CD56dim_cells    | Bindea et al. [16] | FLJ20699 |
| NK_CD56dim_cells    | Bindea et al. [16] | PMEPA1   |
| NK_CD56dim_cells    | Bindea et al. [16] | IL21R    |
| NK_CD56dim_cells    | Bindea et al. [16] | KIR3DL3  |
| NK_CD56dim_cells    | Bindea et al. [16] | KIR2DS5  |
| NK_CD56dim_cells    | Bindea et al. [16] | KIR2DS2  |
| NK_CD56dim_cells    | Bindea et al. [16] | GTF3C1   |
| NK_CD56dim_cells    | Bindea et al. [16] | KIR2DS1  |
| NK_CD56dim_cells    | Bindea et al. [16] | S1PR5    |
| aDC                 | Bindea et al. [16] | CCL1     |
| aDC                 | Bindea et al. [16] | EBI3     |
| aDC                 | Bindea et al. [16] | IDO1     |
| aDC                 | Bindea et al. [16] | LAMP3    |
| aDC                 | Bindea et al. [16] | OAS3     |
| iDC                 | Bindea et al. [16] | CD1B     |
| iDC                 | Bindea et al. [16] | VASH1    |
| iDC                 | Bindea et al. [16] | F13A1    |
| iDC                 | Bindea et al. [16] | CD1E     |
| iDC                 | Bindea et al. [16] | MMP12    |
| iDC                 | Bindea et al. [16] | FABP4    |
| iDC                 | Bindea et al. [16] | CLEC10A  |
| iDC                 | Bindea et al. [16] | SYT17    |
| iDC                 | Bindea et al. [16] | MS4A6A   |
| iDC                 | Bindea et al. [16] | CTNS     |
| iDC                 | Bindea et al. [16] | GUCA1A   |
| iDC                 | Bindea et al. [16] | CARD9    |

|             |                         |           |
|-------------|-------------------------|-----------|
| iDC         | Bindea et al. [16]      | ABCG2     |
| iDC         | Bindea et al. [16]      | CD1A      |
| iDC         | Bindea et al. [16]      | PPARG     |
| iDC         | Bindea et al. [16]      | RAP1GAP   |
| iDC         | Bindea et al. [16]      | SLC7A8    |
| iDC         | Bindea et al. [16]      | GSTT1     |
| iDC         | Bindea et al. [16]      | NM_021941 |
| iDC         | Bindea et al. [16]      | FZD2      |
| iDC         | Bindea et al. [16]      | CSF1R     |
| iDC         | Bindea et al. [16]      | HS3ST2    |
| iDC         | Bindea et al. [16]      | CH25H     |
| iDC         | Bindea et al. [16]      | LMAN2L    |
| iDC         | Bindea et al. [16]      | SLC26A6   |
| iDC         | Bindea et al. [16]      | BLVRB     |
| iDC         | Bindea et al. [16]      | NUDT9     |
| iDC         | Bindea et al. [16]      | PREP      |
| iDC         | Bindea et al. [16]      | DCSTAMP   |
| iDC         | Bindea et al. [16]      | TACSTD2   |
| iDC         | Bindea et al. [16]      | CD1C      |
| pDC         | Charoentong et al. [17] | CBX6      |
| pDC         | Charoentong et al. [17] | DAB2      |
| pDC         | Charoentong et al. [17] | DDX17     |
| pDC         | Charoentong et al. [17] | HIGD1A    |
| pDC         | Charoentong et al. [17] | IDH3A     |
| pDC         | Charoentong et al. [17] | IL3RA     |
| pDC         | Charoentong et al. [17] | MAGED1    |
| pDC         | Charoentong et al. [17] | NUCB2     |
| pDC         | Charoentong et al. [17] | OFD1      |
| pDC         | Charoentong et al. [17] | OGT       |
| pDC         | Charoentong et al. [17] | PDIA4     |
| pDC         | Charoentong et al. [17] | SERTAD2   |
| pDC         | Charoentong et al. [17] | SIRPA     |
| pDC         | Charoentong et al. [17] | TMED2     |
| pDC         | Charoentong et al. [17] | ENG       |
| pDC         | Charoentong et al. [17] | FCAR      |
| pDC         | Charoentong et al. [17] | IGF1      |
| pDC         | Charoentong et al. [17] | ITGA2B    |
| pDC         | Charoentong et al. [17] | GABARAP   |
| pDC         | Charoentong et al. [17] | GPX1      |
| pDC         | Charoentong et al. [17] | KRT23     |
| pDC         | Charoentong et al. [17] | PROK2     |
| pDC         | Charoentong et al. [17] | RALB      |
| pDC         | Charoentong et al. [17] | RETNLB    |
| pDC         | Charoentong et al. [17] | RNF141    |
| pDC         | Charoentong et al. [17] | SEC14L1   |
| pDC         | Charoentong et al. [17] | SEPX1     |
| pDC         | Charoentong et al. [17] | EMP3      |
| pDC         | Charoentong et al. [17] | CD300LF   |
| pDC         | Charoentong et al. [17] | ABTB1     |
| pDC         | Charoentong et al. [17] | KLHL21    |
| pDC         | Charoentong et al. [17] | PHRF1     |
| Eosinophils | Bindea et al. [16]      | IL5RA     |
| Eosinophils | Bindea et al. [16]      | KCNH2     |
| Eosinophils | Bindea et al. [16]      | TKTL1     |
| Eosinophils | Bindea et al. [16]      | ADGRE1    |
| Eosinophils | Bindea et al. [16]      | CCR3      |
| Eosinophils | Bindea et al. [16]      | ACACB     |
| Eosinophils | Bindea et al. [16]      | THBS1     |
| Eosinophils | Bindea et al. [16]      | GALC      |
| Eosinophils | Bindea et al. [16]      | RNU2      |

|             |                    |           |
|-------------|--------------------|-----------|
| Eosinophils | Bindea et al. [16] | CLC       |
| Eosinophils | Bindea et al. [16] | HIST1H1C  |
| Eosinophils | Bindea et al. [16] | CYSLTR2   |
| Eosinophils | Bindea et al. [16] | HRH4      |
| Eosinophils | Bindea et al. [16] | RNASE2    |
| Eosinophils | Bindea et al. [16] | CAT       |
| Eosinophils | Bindea et al. [16] | LRP5L     |
| Eosinophils | Bindea et al. [16] | SYNJ1     |
| Eosinophils | Bindea et al. [16] | THBS4     |
| Eosinophils | Bindea et al. [16] | PTGDR2    |
| Eosinophils | Bindea et al. [16] | KBTBD11   |
| Eosinophils | Bindea et al. [16] | HES1      |
| Eosinophils | Bindea et al. [16] | ABHD2     |
| Eosinophils | Bindea et al. [16] | TIPARP    |
| Eosinophils | Bindea et al. [16] | SMPD3     |
| Eosinophils | Bindea et al. [16] | MYO15B    |
| Eosinophils | Bindea et al. [16] | TGIF1     |
| Eosinophils | Bindea et al. [16] | RRP12     |
| Eosinophils | Bindea et al. [16] | CD101     |
| Eosinophils | Bindea et al. [16] | RCOR3     |
| Eosinophils | Bindea et al. [16] | EPN2      |
| Eosinophils | Bindea et al. [16] | TRMO      |
| Eosinophils | Bindea et al. [16] | SIAH1     |
| Mast_cells  | Bindea et al. [16] | PRG2      |
| Mast_cells  | Bindea et al. [16] | CTSG      |
| Mast_cells  | Bindea et al. [16] | TPSAB1    |
| Mast_cells  | Bindea et al. [16] | SLC18A2   |
| Mast_cells  | Bindea et al. [16] | MS4A2     |
| Mast_cells  | Bindea et al. [16] | CPA3      |
| Mast_cells  | Bindea et al. [16] | TPSB2     |
| Mast_cells  | Bindea et al. [16] | NM_003293 |
| Mast_cells  | Bindea et al. [16] | GATA2     |
| Mast_cells  | Bindea et al. [16] | HDC       |
| Mast_cells  | Bindea et al. [16] | VWA5A     |
| Mast_cells  | Bindea et al. [16] | SIGLEC6   |
| Mast_cells  | Bindea et al. [16] | ELANE     |
| Mast_cells  | Bindea et al. [16] | LOH11CR2A |
| Mast_cells  | Bindea et al. [16] | CMA1      |
| Mast_cells  | Bindea et al. [16] | PGDS      |
| Mast_cells  | Bindea et al. [16] | MLPH      |
| Mast_cells  | Bindea et al. [16] | ADCYAP1   |
| Mast_cells  | Bindea et al. [16] | SLC24A3   |
| Mast_cells  | Bindea et al. [16] | CALB2     |
| Mast_cells  | Bindea et al. [16] | KIT       |
| Mast_cells  | Bindea et al. [16] | TAL1      |
| Mast_cells  | Bindea et al. [16] | ABCC4     |
| Mast_cells  | Bindea et al. [16] | PPM1H     |
| Mast_cells  | Bindea et al. [16] | MAOB      |
| Mast_cells  | Bindea et al. [16] | HPGD      |
| Mast_cells  | Bindea et al. [16] | SCG2      |
| Mast_cells  | Bindea et al. [16] | PTGS1     |
| Mast_cells  | Bindea et al. [16] | CEACAM8   |
| Mast_cells  | Bindea et al. [16] | MPO       |
| Mast_cells  | Bindea et al. [16] | NR0B1     |
| Mast_cells  | Bindea et al. [16] | LOC339524 |
| Neutrophils | Bindea et al. [16] | CSF3R     |
| Neutrophils | Bindea et al. [16] | CYP4F3    |
| Neutrophils | Bindea et al. [16] | VNN3      |
| Neutrophils | Bindea et al. [16] | FPR2      |
| Neutrophils | Bindea et al. [16] | KCNJ15    |

|             |                    |           |
|-------------|--------------------|-----------|
| Neutrophils | Bindea et al. [16] | MME       |
| Neutrophils | Bindea et al. [16] | CXCR1     |
| Neutrophils | Bindea et al. [16] | CXCR2     |
| Neutrophils | Bindea et al. [16] | FCGR3B    |
| Neutrophils | Bindea et al. [16] | DYSF      |
| Neutrophils | Bindea et al. [16] | FCAR      |
| Neutrophils | Bindea et al. [16] | CEACAM3   |
| Neutrophils | Bindea et al. [16] | HIST1H2BC |
| Neutrophils | Bindea et al. [16] | HPSE      |
| Neutrophils | Bindea et al. [16] | FLJ11151  |
| Neutrophils | Bindea et al. [16] | CREB5     |
| Neutrophils | Bindea et al. [16] | S100A12   |
| Neutrophils | Bindea et al. [16] | TNFRSF10C |
| Neutrophils | Bindea et al. [16] | SLC22A4   |
| Neutrophils | Bindea et al. [16] | TECPR2    |
| Neutrophils | Bindea et al. [16] | SLC25A37  |
| Neutrophils | Bindea et al. [16] | BST1      |
| Neutrophils | Bindea et al. [16] | CRISPLD2  |
| Neutrophils | Bindea et al. [16] | G0S2      |
| Neutrophils | Bindea et al. [16] | SIGLEC5   |
| Neutrophils | Bindea et al. [16] | CD93      |
| Neutrophils | Bindea et al. [16] | MGAM      |
| Neutrophils | Bindea et al. [16] | ALPL      |
| Neutrophils | Bindea et al. [16] | FPR1      |
| Neutrophils | Bindea et al. [16] | PDE4B     |
| Neutrophils | Bindea et al. [16] | LILRB2    |
| Macrophages | Bindea et al. [16] | MARCO     |
| Macrophages | Bindea et al. [16] | CXCL5     |
| Macrophages | Bindea et al. [16] | SCG5      |
| Macrophages | Bindea et al. [16] | SULT1C4   |
| Macrophages | Bindea et al. [16] | MSR1      |
| Macrophages | Bindea et al. [16] | CTSK      |
| Macrophages | Bindea et al. [16] | PTGDS     |
| Macrophages | Bindea et al. [16] | COLEC12   |
| Macrophages | Bindea et al. [16] | GPC4      |
| Macrophages | Bindea et al. [16] | PCOLCE2   |
| Macrophages | Bindea et al. [16] | CHIT1     |
| Macrophages | Bindea et al. [16] | ANOS1     |
| Macrophages | Bindea et al. [16] | CLEC5A    |
| Macrophages | Bindea et al. [16] | ME1       |
| Macrophages | Bindea et al. [16] | DNASE2B   |
| Macrophages | Bindea et al. [16] | CCL7      |
| Macrophages | Bindea et al. [16] | FN1       |
| Macrophages | Bindea et al. [16] | CD163     |
| Macrophages | Bindea et al. [16] | GM2A      |
| Macrophages | Bindea et al. [16] | SCARB2    |
| Macrophages | Bindea et al. [16] | BCAT1     |
| Macrophages | Bindea et al. [16] | RAI14     |
| Macrophages | Bindea et al. [16] | COL8A2    |
| Macrophages | Bindea et al. [16] | APOE      |
| Macrophages | Bindea et al. [16] | CHI3L1    |
| Macrophages | Bindea et al. [16] | ATG7      |
| Macrophages | Bindea et al. [16] | CD84      |
| Macrophages | Bindea et al. [16] | FDX1      |
| Macrophages | Bindea et al. [16] | MS4A4A    |
| Macrophages | Bindea et al. [16] | SGMS1     |
| Macrophages | Bindea et al. [16] | EMP1      |
| Macrophages | Bindea et al. [16] | CYBB      |
| Macrophages | Bindea et al. [16] | CD68      |

**Supplementary Table 3.** Multivariate analysis of clinicopathological variables by immune group. Results from a multinomial logistic regression.

|                     |             | IG2            |         |         |         | IG3            |         |         |         |
|---------------------|-------------|----------------|---------|---------|---------|----------------|---------|---------|---------|
|                     |             | Point estimate | 95% LCI | 95% UCI | p-value | Point estimate | 95% LCI | 95% UCI | p-value |
|                     | (Intercept) | 3.77           | 0.29    | 48.84   | 0.3099  | 9.55           | 0.43    | Inf     | 0.1522  |
|                     | Age         | 0.97           | 0.94    | 1       | 0.0538  | 0.96           | 0.92    | 1       | 0.0324  |
| Sex                 | Female      | 0.64           | 0.25    | 1.61    | 0.341   | 1.63           | 0.54    | 4.95    | 0.3868  |
|                     | II          | 2.3            | 0.39    | 13.65   | 0.36    | 0.91           | 0.13    | 6.42    | 0.9278  |
| Stage               | III         | 3.15           | 0.61    | 16.33   | 0.1723  | 1.07           | 0.19    | 6.08    | 0.9382  |
|                     | IV          | 2.55           | 0.46    | 14.25   | 0.2853  | 0.48           | 0.06    | 3.51    | 0.4657  |
| Histology           | Biphasic    | 0.49           | 0.25    | 0.94    | 0.0319  | 0.11           | 0.02    | 0.5     | 0.0045  |
|                     | Sarcomatoid | 0.21           | 0.02    | 1.81    | 0.1545  | -              | -       | -       | -       |
| Asbestos            | Possible    | 2.04           | 0.15    | 27.47   | 0.5902  | 2.26           | 0.1     | 50.27   | 0.6057  |
|                     | Yes         | 0.44           | 0.22    | 0.9     | 0.0238  | 0.43           | 0.15    | 1.22    | 0.1108  |
| Neoadjuvant therapy | Yes         | 2.49           | 1.03    | 6.01    | 0.0428  | 3.13           | 0.89    | 11.01   | 0.0756  |

**Supplementary Table 4.** Comparison of immune groups with other published classifications.

|                                          | N   | IG1<br>N=106 | IG2<br>N=78 | IG3<br>N=27 | p-value |
|------------------------------------------|-----|--------------|-------------|-------------|---------|
| Bueno et al. classification, N (%):      | 211 |              |             |             | <0.001  |
| Epithelioid                              |     | 12 (11.32%)  | 26 (33.33%) | 16 (59.26%) |         |
| Biphasic-E                               |     | 42 (39.62%)  | 21 (26.92%) | 9 (33.33%)  |         |
| Biphasic-S                               |     | 37 (34.91%)  | 19 (24.36%) | 0 (0.00%)   |         |
| Sarcomatoid                              |     | 15 (14.15%)  | 12 (15.38%) | 2 (7.41%)   |         |
| Hmeljak et al. classification, N (%):    | 74  |              |             |             | 0.008   |
| S1                                       |     | 4 (10.81%)   | 10 (33.33%) | 5 (71.43%)  |         |
| S2                                       |     | 6 (16.22%)   | 7 (23.33%)  | 2 (28.57%)  |         |
| S3                                       |     | 14 (37.84%)  | 6 (20.00%)  | 0 (0.00%)   |         |
| S4                                       |     | 13 (35.14%)  | 7 (23.33%)  | 0 (0.00%)   |         |
| De Reyniès et al. classification, N (%): | 38  |              |             |             | 0.119   |
| C1                                       |     | 7 (29.17%)   | 7 (53.85%)  | 1 (100.00%) |         |
| C2                                       |     | 17 (70.83%)  | 6 (46.15%)  | 0 (0.00%)   |         |
